# Supplementary material
Source: MDPI journal article supplement (https://www.mdpi.com/2071-1050/9/6/988)
Supplement: s1 [file s1]

## 2014 Household Survey Questionnaire for Small Hydropower Substituting Fuel (SHSF) in Majiang, Guizhou

Tel / Phone:

|                 |                                                               |                  |
|-----------------|---------------------------------------------------------------|------------------|
| Interview Date: | Admin Village:                                                | Residence Group: |
| Interviewer:    | UTM: E: ___, ___; N: ___, ___; Zone:___<br>Elevation(m):_____ |                  |

## Section 1: Household member information

[illegible]

### Non-agricultural income

| Non-agricultural income(work out of town, local work, business, other ) |  |                |          |                           |                      |                              |
|-------------------------------------------------------------------------|--|----------------|----------|---------------------------|----------------------|------------------------------|
| Non-agr member                                                          |  | Occupat<br>ion | Location | Working time<br>last year | Gross<br>income/yuan | Remittance per year/<br>yuan |
| 1                                                                       |  |                |          |                           |                      |                              |
| 2                                                                       |  |                |          |                           |                      |                              |
| 3                                                                       |  |                |          |                           |                      |                              |
| 4                                                                       |  |                |          |                           |                      |                              |
|                                                                         |  |                |          |                           |                      |                              |
|                                                                         |  |                |          |                           |                      |                              |

| Section 2: Agricultural income last year                                           |               |               |            |                  |             |           |
|------------------------------------------------------------------------------------|---------------|---------------|------------|------------------|-------------|-----------|
| 1. Paddy area: _____, Paddy planted last year: _____, Paddy other use: _____       |               |               |            |                  |             |           |
| 2. Dryland area: _____, Dryland planted last year: _____, Dryland other use: _____ |               |               |            |                  |             |           |
| 3. Rice paddy leased out: _____, Rice paddy lease received: _____                  |               |               |            |                  |             |           |
| 4. Dryland leased out: _____, Dryland lease received: _____                        |               |               |            |                  |             |           |
| 5. Rice paddy rented in: _____, Rice paddy rent paid: _____                        |               |               |            |                  |             |           |
| 6. Dryland rented in: _____, Dryland rent paid: _____                              |               |               |            |                  |             |           |
| 7. Farming labor income: _____                                                     |               |               |            |                  |             |           |
| Crop planted                                                                       | Total area/mu | Harvest / jin | Sold / jin | Price (yuan/jin) | Total price | Other use |
| Rice                                                                               |               |               |            |                  |             |           |
| Wheat                                                                              |               |               |            |                  |             |           |
| Oilseed                                                                            |               |               |            |                  |             |           |
| Corn                                                                               |               |               |            |                  |             |           |
| Sweet potato                                                                       |               |               |            |                  |             |           |
| Bean                                                                               |               |               |            |                  |             |           |
| Peanut                                                                             |               |               |            |                  |             |           |
| Zizania                                                                            |               |               |            |                  |             |           |
| Tea                                                                                |               |               |            |                  |             |           |
| Gastroid Elata                                                                     |               |               |            |                  |             |           |
| Ginseng                                                                            |               |               |            |                  |             |           |
| Mushroom                                                                           |               |               |            |                  |             |           |
| Agaric                                                                             |               |               |            |                  |             |           |
| Ginger                                                                             |               |               |            |                  |             |           |
| Other crop                                                                         |               |               |            |                  |             |           |
|                                                                                    |               |               |            |                  |             |           |
|                                                                                    |               |               |            |                  |             |           |

| Livestock quantity (now) |          |       |       |     |        |     |     |       |
|--------------------------|----------|-------|-------|-----|--------|-----|-----|-------|
| Chicken                  | Duck/ten | Goose | Sheep | Pig | Cattle | Dog | Cat | Other |
|                          |          |       |       |     |        |     |     |       |

| Agricultural cost last year |          |        |       |      |               |          |        |       |      |
|-----------------------------|----------|--------|-------|------|---------------|----------|--------|-------|------|
|                             | Quantity | Unit-p | Price | Note |               | Quantity | Unit-p | Price | Note |
| Fertilizer                  |          |        |       |      | Labor seed    |          |        |       |      |
| Pesticide                   |          |        |       |      | Labor harvest |          |        |       |      |
| Herbicide                   |          |        |       |      | Labor tea     |          |        |       |      |
| Rice seed                   |          |        |       |      | Labor tillage |          |        |       |      |
| Wheat seed                  |          |        |       |      | Plastic film  |          |        |       |      |
| Corn seed                   |          |        |       |      | Farming tool  |          |        |       |      |
| GE seed                     |          |        |       |      | Forage        |          |        |       |      |
| Other seed                  |          |        |       |      | Other cost    |          |        |       |      |
|                             |          |        |       |      |               |          |        |       |      |
|                             |          |        |       |      |               |          |        |       |      |

### Section 3: Crop Raiding Survey (last year)

|                                                                                                                                                                                                                                                                                                                                                                                                                                                                                                                                                                                                                                      |
|--------------------------------------------------------------------------------------------------------------------------------------------------------------------------------------------------------------------------------------------------------------------------------------------------------------------------------------------------------------------------------------------------------------------------------------------------------------------------------------------------------------------------------------------------------------------------------------------------------------------------------------|
| 1. Was there crop raiding by wilds last year? 1) yes, 2) no, 3) I don't know                                                                                                                                                                                                                                                                                                                                                                                                                                                                                                                                                         |
| 2. Was crop raiding severe last year? 1) very much, 2) severe, 3) normal, 4) light, 5) none                                                                                                                                                                                                                                                                                                                                                                                                                                                                                                                                          |
| 3. In 2002, Was crop raiding severe?<br>1) very much, 2) severe, 3) normal, 4) light, 5) none                                                                                                                                                                                                                                                                                                                                                                                                                                                                                                                                        |
| 4. Crop raiding comparison: when was more severe<br>1) recent, 2) 2002, 3) same, 4) I don't know                                                                                                                                                                                                                                                                                                                                                                                                                                                                                                                                     |
| 5. Which crops were raided by wilds?<br>1) Rice, 2) Corn, 3) GE, 4) Wheat, 5) Sweet potato, 6) Bean, 7) Peanut, 8) Vegetable, 9) Other ____                                                                                                                                                                                                                                                                                                                                                                                                                                                                                          |
| 6. What were the extent of crop raiding? 1) very much, 2) severe, 3) normal, 4) light, 5) none<br>Crop 1: _____ Extent: _____<br>Crop 2: _____ Extent: _____<br>Crop 3: _____ Extent: _____<br><br>Crop 4: _____ Extent: _____                                                                                                                                                                                                                                                                                                                                                                                                       |
| 7. Please rank by the extent: first: _____, second: _____, 3rd: _____, 4th: _____, 5th: _____, 6th: _____, 7th: _____.                                                                                                                                                                                                                                                                                                                                                                                                                                                                                                               |
| 8. Was there any livestock attacked by wilds? 1) no, 2) yes<br>Livestock 1: _____ Raiding wild: _____ Loss quantity: _____.<br>Livestock 2: _____ Raiding wild: _____ Loss quantity: _____.<br>Livestock 3: _____ Raiding wild: _____ Loss quantity: _____.                                                                                                                                                                                                                                                                                                                                                                          |
| 9. The most frequent wild is: _____, next: _____, next: _____, next: _____, next: _____, next: _____.<br>1) Wild boar; 2) bird; 3) rabbit; 4) Badger; 5) rat; 6) squirrel; 7) Goat; 8) other wild _____                                                                                                                                                                                                                                                                                                                                                                                                                              |
| 10. What measure did you take to against crop raiding?<br>1) Human care, 2) fence, 3) trap, 4) poison, 5) hunt, 6) scarecrow, 7) torch, 8) other measure ____<br>Wild animal 1: _____, measure: _____, _____, _____; rate: _____<br>Wild animal 2: _____, measure: _____, _____, _____; rate: _____<br>Wild animal 3: _____, measure: _____, _____, _____; rate: _____<br>Wild animal 4: _____, measure: _____, _____, _____; rate: _____<br><br>Measure 1: _____, times: _____, How long each time: _____<br>Measure 2: _____, times: _____, How long each time: _____<br>Measure 3: _____, times: _____, How long each time: _____ |
| 11. Have you ever take alternative crop to plant? 1) yes, 2) no<br><br>If yes, previous crop: _____, replaced with: _____; reason: _____                                                                                                                                                                                                                                                                                                                                                                                                                                                                                             |
| 12. How many pieces of paddy land: _____, How many pieces of Dryland: _____                                                                                                                                                                                                                                                                                                                                                                                                                                                                                                                                                          |

#### Section4: Fuel Survey (last year)

##### Part1.Region with SHSF

1. What is the fuel structure last year? (1) Electricity, (2) Coal , (3) Gas, (4) Solar energy, (5) Fuel and Wood, (6) Stalks, (7) Other\_\_\_\_\_

1) Electricity consumption:\_\_\_\_\_, Source:(1) SHSF:\_\_\_\_\_, (2) Power grid:\_\_\_\_\_, Unit-p:\_\_\_\_\_, Price:\_\_\_\_\_

2) Coal consumption:\_\_\_\_\_, Source:\_\_\_\_\_, Unit-p:\_\_\_\_\_, Price:\_\_\_\_\_

3) Gas consumption:\_\_\_\_\_, Source:\_\_\_\_\_, Unit-p:\_\_\_\_\_, Price:\_\_\_\_\_

4) Solar energy consumption:\_\_\_\_\_, Source:\_\_\_\_\_, Unit-p:\_\_\_\_\_, Price:\_\_\_\_\_

—  
5) Fuel and wood consumption:\_\_\_\_\_, (1)Component: ① A whole tree (most, some, a few), ② Trunk (most, some, a few), ③ Branch (most, some, a few), ④ Leaf (most, some, a few), ⑤ Root (most, some, a few), ⑥ A whole shrub (most, some, a few), ⑦Shrub branch (most, some, a few),⑧ Shrub leaf (most, some, a few), ⑨ Dry branches and fallen leaves (most, some, a few), (2)Source: ①Harvest, ② Purchase, (3)Harvest location: ① Summit, ②Hillside, ③Foot, ④ Gully, (4)Unit-p:\_\_\_\_\_,(5)Price:\_\_\_\_\_

6) Stalks consumption:\_\_\_\_\_, Source:1) Harvest:\_\_\_\_\_, 2) Purchase:\_\_\_\_\_, Unit-p:\_\_\_\_\_, Price:\_\_\_\_\_

2.Transformation after running SHSF: 1) Fresher air, 2) More luxuriant forests, 3) More beautiful environment, 4) More convenient living conditions

(1) What was the extent of air condition? 1) very good, 2) good, 3) normal, 4) light, 5) none

(2) What was the extent of forests growing? 1) very good, 2) good, 3) normal, 4) light, 5) none

(3) What was the extent of environment improving? 1) very good, 2) good, 3) normal, 4) light, 5) none

(4) What was the extent of living conditions? 1) very good, 2) good, 3) normal, 4) light, 5) none

3. How do you evaluate SHSF?1) Very good, 2) Good, 3) Normal, 4) None

| Electricity use  | 3    | 2    | 1     | 0    |
|------------------|------|------|-------|------|
|                  | Most | Some | A few | None |
| Electric Cooking |      |      |       |      |
| Pot/Microwave    |      |      |       |      |
| A/C              |      |      |       |      |
| Refrigerator     |      |      |       |      |
| Washing machine  |      |      |       |      |
| Computer         |      |      |       |      |
| Lighting         |      |      |       |      |
| Other_____       |      |      |       |      |

| Fuel, wood and stalks use | 3    | 2    | 1     | 0    |
|---------------------------|------|------|-------|------|
|                           | Most | Some | A few | None |
| Daily life                |      |      |       |      |
| Raise livestock           |      |      |       |      |
| Winter heating            |      |      |       |      |
| Other:_____               |      |      |       |      |

**Part II. Region with small hydropower station (without substituting firewood)**

1. What is the fuel structure last year? (1) Electricity, (2) Coal, (3) Gas, (4) Solar energy, (5) Fuel and Wood, (6) Stalks, (7) Other\_\_\_\_\_

1) Electricity consumption:\_\_\_\_\_, Source:(1) SHSF:\_\_\_\_\_, (2) Power grid:\_\_\_\_\_, Unit-p:\_\_\_\_\_, Price:\_\_\_\_\_

2) Coal consumption:\_\_\_\_\_, Source:\_\_\_\_\_, Unit-p:\_\_\_\_\_, Price:\_\_\_\_\_

3) Gas consumption:\_\_\_\_\_, Source:\_\_\_\_\_, Unit-p:\_\_\_\_\_, Price:\_\_\_\_\_

4) Solar energy consumption:\_\_\_\_\_, Source:\_\_\_\_\_, Unit-p:\_\_\_\_\_, Price:\_\_\_\_\_

5) Fuel and wood consumption:\_\_\_\_\_, (1)Component: ① A whole tree (most, some, a few), ② Trunk (most, some, a few), ③ Branch (most, some, a few), ④ Leaf (most, some, a few), ⑤ Root (most, some, a few), ⑥ A whole shrub (most, some, a few), ⑦Shrub branch (most, some, a few),⑧ Shrub leaf (most, some, a few), ⑨ Dry branches and fallen leaves (most, some, a few), (2)Source: ①Harvest, ② Purchase, (3)Harvest location: ① Summit, ②Hillside, ③Foot, ④ Gully, (4)Unit-p:\_\_\_\_\_,(5)Price:\_\_\_\_\_

6) Stalks consumption:\_\_\_\_\_, Source:1) Harvest:\_\_\_\_\_, 2) Purchase:\_\_\_\_\_, Unit-p:\_\_\_\_\_, Price:\_\_\_\_\_

2. Have you ever heard of SHSF? 1) Yes, 2) No, 3) I don't know

3. Do you think the small hydropower station makes your life more convenient?1) Yes, 2) No, 3) I don't know

4. Have the frequency of cutting firewood changed after the construction of small hydropower station? 1) More, 2) Less, 3) Not changed, 4) I don't know

5. Have the quantity of fuel wood and stalks changed after the construction of small hydropower station? 1) More, 2) Less, 3) Not changed, 4) I don't know

| Electricity use                | 3    | 2    | 1     | 0    |
|--------------------------------|------|------|-------|------|
|                                | Most | Some | A few | None |
| Electric Cooking Pot/Microwave |      |      |       |      |
| A/C                            |      |      |       |      |
| Refrigerator                   |      |      |       |      |
| Washing machine                |      |      |       |      |
| Computer                       |      |      |       |      |
| Lighting                       |      |      |       |      |
| Other_____                     |      |      |       |      |

| Fuel, wood and stalks use | 3 | 2 | 1 | 0 |
|---------------------------|---|---|---|---|
|---------------------------|---|---|---|---|

|                 | <b>Most</b> | <b>Some</b> | <b>A few</b> | <b>None</b> |
|-----------------|-------------|-------------|--------------|-------------|
| Daily life      |             |             |              |             |
| Raise livestock |             |             |              |             |
| Winter heating  |             |             |              |             |
| Other:_____     |             |             |              |             |

### Part III. Region without small hydropower station

1. What is the fuel structure last year? (1) Electricity, (2) Coal , (3) Gas, (4) Solar energy, (5) Fuel and Wood, (6) Stalks, (7) Other\_\_\_\_\_

1) Electricity consumption: \_\_\_\_\_, Source:(1) SHSF: \_\_\_\_\_, (2) Power grid: \_\_\_\_\_, Unit-p: \_\_\_\_\_, Price: \_\_\_\_\_

2) Coal consumption: \_\_\_\_\_, Source: \_\_\_\_\_, Unit-p: \_\_\_\_\_, Price: \_\_\_\_\_

3) Gas consumption: \_\_\_\_\_, Source: \_\_\_\_\_, Unit-p: \_\_\_\_\_, Price: \_\_\_\_\_

4) Solar energy consumption: \_\_\_\_\_, Source: \_\_\_\_\_, Unit-p: \_\_\_\_\_, Price: \_\_\_\_\_

5) Fuel and wood consumption: \_\_\_\_\_, (1)Component: ① A whole tree (most, some, a few), ② Trunk (most, some, a few), ③ Branch (most, some, a few), ④ Leaf (most, some, a few), ⑤ Root (most, some, a few), ⑥ A whole shrub (most, some, a few), ⑦ Shrub branch (most, some, a few), ⑧ Shrub leaf (most, some, a few), ⑨ Dry branches and fallen leaves (most, some, a few), (2)Source: ① Harvest, ② Purchase, (3)Harvest location: ① Summit, ② Hillside, ③ Foot, ④ Gully, (4)Unit-p: \_\_\_\_\_, (5)Price: \_\_\_\_\_

6) Stalks consumption: \_\_\_\_\_, Source: 1) Harvest: \_\_\_\_\_, 2) Purchase: \_\_\_\_\_, Unit-p: \_\_\_\_\_, Price: \_\_\_\_\_

2. Have you ever heard of SHSF? 1) Yes, 2) No, 3) I don't know

3. Do you want to take part in SHSF? 1) Yes, 2) No, 3) I don't know

4. If taking part in SHSF, does the frequency of cutting firewood change? 1) Will become more, 2) Will become less, 3) Will not change, 4) I don't know

| <b>Electricity use</b>         | <b>3</b>    | <b>2</b>    | <b>1</b>     | <b>0</b>    |
|--------------------------------|-------------|-------------|--------------|-------------|
|                                | <b>Most</b> | <b>Some</b> | <b>A few</b> | <b>None</b> |
| Electric Cooking Pot/Microwave |             |             |              |             |
| A/C                            |             |             |              |             |
| Refrigerator                   |             |             |              |             |
| Washing machine                |             |             |              |             |
| Computer                       |             |             |              |             |
| Lighting                       |             |             |              |             |
| Other_____                     |             |             |              |             |

| <b>Fuel, wood and stalks use</b> | <b>3</b>    | <b>2</b>    | <b>1</b>     | <b>0</b>    |
|----------------------------------|-------------|-------------|--------------|-------------|
|                                  | <b>Most</b> | <b>Some</b> | <b>A few</b> | <b>None</b> |
| Daily life                       |             |             |              |             |
| Raise livestock                  |             |             |              |             |
| Winter heating                   |             |             |              |             |
| Other:_____                      |             |             |              |             |

| Section 5: Household wellness indicators |                                                   |        |
|------------------------------------------|---------------------------------------------------|--------|
| Category                                 | items                                             | points |
| Transportation                           | Sedan or minivan                                  | 5      |
|                                          | Truck                                             | 4      |
|                                          | Motor Cycle/Tricycle                              | 3      |
|                                          | Electric Bike                                     | 2      |
|                                          | Bike or Man-Powered Tricycle                      | 1      |
|                                          | None                                              | 0      |
| Electrics                                | A/C                                               | 5      |
|                                          | Solar panel                                       | 4      |
|                                          | Refrigerator                                      | 3      |
|                                          | Washing/Dry Machine                               | 2      |
|                                          | Electric Cooking Pot/Microwave                    | 1      |
|                                          | None                                              | 0      |
| Communication                            | Computer                                          | 5      |
|                                          | Cell phone                                        | 4      |
|                                          | Fixed line phone                                  | 3      |
|                                          | TV/Stereophony                                    | 2      |
|                                          | Radio                                             | 1      |
|                                          | None                                              | 0      |
| Fuel                                     | Coal, Gas or Electricity only, no fuel wood       | 5      |
|                                          | Primarily Coal, Gas & Electricity, some Fuel Wood | 4      |
|                                          | Half Coal, Gas & Electricity, Half fuel Wood      | 3      |
|                                          | Primarily Fuel Wood, Some Coal, Gas& Electricity  | 2      |
|                                          | Fuel Wood only                                    | 1      |
|                                          | Rice, Wheat or Corn Stalks Only                   | 0      |
| Residence                                | Three Story Concrete                              | 5      |
|                                          | Two Story Concrete with Indoor Bathroom           | 4      |
|                                          | Two Story Concrete without Indoor Bathroom        | 3      |
|                                          | Single Story Brick House                          | 2      |
|                                          | Adobe House                                       | 1      |
|                                          | No House                                          | 0      |
| Farming Tools                            | Tractor(> ¥2000 Yuan)                             | 5      |
|                                          | Thrash Machine/Other Small Food Process Machine   | 4      |
|                                          | Electric Pump                                     | 3      |
|                                          | Oxen                                              | 2      |
|                                          | Hoes,                                             | 1      |
|                                          | Lost Farming Ability                              | 0      |
| Total points                             |                                                   |        |
